# Supplementary material for: Diastereoselective supramolecular ion-pairing between the TRISPHAT anion and pro-chiral heptamethine cyanine dyes
Source: Royal Society of Chemistry journal article supplement (doi:10.1039/b905366b), 2009-01-01
Supplement: b905366b.pdf [file b905366b.pdf]

*Supporting information for:*

**Diasereoselective supramolecular ion-pairing between TRISPHAT anion  
and *pro*-chiral heptamethine cyanine dye.**

Pierre-Antoine Bouit, Christophe Aronica, Laure Guy, Alexandre Martinez, Chantal Andraud,

Olivier Maury\*

**X-ray crystallography.**

*Data collection:* For compounds [1][*rac*-TRISPHAT], processing of the data was performed by the KappaCCD analysis softwares.<sup>1</sup> The lattice constants were refined by least-square refinement using 7191 reflections ( $1.07^\circ < \theta < 27.8^\circ$ ).

*Structure solution and refinement:* [1][*rac*-TRISPHAT] crystallize in the triclinic system and according to the observed systematic extinctions, the structures have been solved in the *P*-1 space group (No. 2). The structure was solved by direct methods using the SIR97 program<sup>2</sup> combined to Fourier difference syntheses and refined against *F* using reflections with  $[I/\sigma(I) > 2]$  with the CRYSTALS program<sup>3</sup>. All atomic displacements parameters for non-hydrogen atoms have been refined with anisotropic terms. After anisotropic refinement, all the hydrogen atoms are found with a Fourier Difference. Table 1 summarizes the crystallographic data and refinement details for [1][*rac*-TRISPHAT].

**Table 1:** Crystal data and structure refinement parameters.

|                                                          | [1][ <i>rac</i> -TRISPHAT]                                                       |
|----------------------------------------------------------|----------------------------------------------------------------------------------|
| Formula                                                  | C <sub>66</sub> H <sub>52</sub> Cl <sub>13</sub> N <sub>2</sub> O <sub>6</sub> P |
| f.w. (g.mol <sup>-1</sup> )                              | 1461.01                                                                          |
| Cryst. Syst.                                             | Triclinic                                                                        |
| Space group                                              | <i>P</i> -1 (No. 2)                                                              |
| a (Å)                                                    | 13.673 (5)                                                                       |
| b (Å)                                                    | 14.213 (5)                                                                       |
| c (Å)                                                    | 20.031 (5)                                                                       |
| α (°)                                                    | 73.329 (2)                                                                       |
| β (°)                                                    | 89.059 (5)                                                                       |
| γ (°)                                                    | 62.217 (3)                                                                       |
| V (Å <sup>3</sup> )                                      | 3267.5 (2)                                                                       |
| Z                                                        | 2                                                                                |
| T (K)                                                    | 293                                                                              |
| λ(MoKα) (Å)                                              | 0.71069                                                                          |
| D (g.cm <sup>-3</sup> )                                  | 1.485                                                                            |
| μ (mm <sup>-1</sup> )                                    | 0.63                                                                             |
| R(F) <sup>a</sup> , I>1σ(Fo)                             | 0.051                                                                            |
| R <sub>w</sub> (F <sup>2</sup> ) <sup>b</sup> , I>1σ(Fo) | 0.050                                                                            |
| S                                                        | 1.10                                                                             |
| R <sub>int</sub>                                         | 0.048                                                                            |
| θ <sub>max</sub>                                         | 27.8°                                                                            |
| h                                                        | -17 → 17                                                                         |
| k                                                        | -18 → 18                                                                         |
| l                                                        | -26 → 26                                                                         |
| Parameters                                               | 793                                                                              |
| Measured reflections                                     | 27915                                                                            |
| Independent reflections                                  | 15362                                                                            |
| Reflections with I >                                     | 7191                                                                             |
| Δρ <sub>min</sub>                                        | -0.33 e Å <sup>-1</sup>                                                          |
| Δρ <sub>max</sub>                                        | 0.61 e Å <sup>-1</sup>                                                           |

$$^a R(F) = \frac{\sum ||F_o| - |F_c||}{\sum |F_o|}, \quad ^b R_w(F) = \frac{\sum [w ((F_o^2 - F_c^2)^2)]^{1/2}}{\sum w F_o^4}^{1/2}$$

*Crystal packing description.* Chromophore **1**<sup>+</sup> crystallize in a triclinic and centrosymmetric space group. The crystal lattice in **1**<sup>+</sup> is constituted of layers of molecules linked together by C-H...π (d ≈ 3.1 Å) bonds between axials hydrogen from the central 6-members ring and to an

aromatic cycle of the Trisphat counter-anion. One benzyl group interacts with Trisphat, hence that ensure the crystal cohesion by  $\pi$ -stacking.

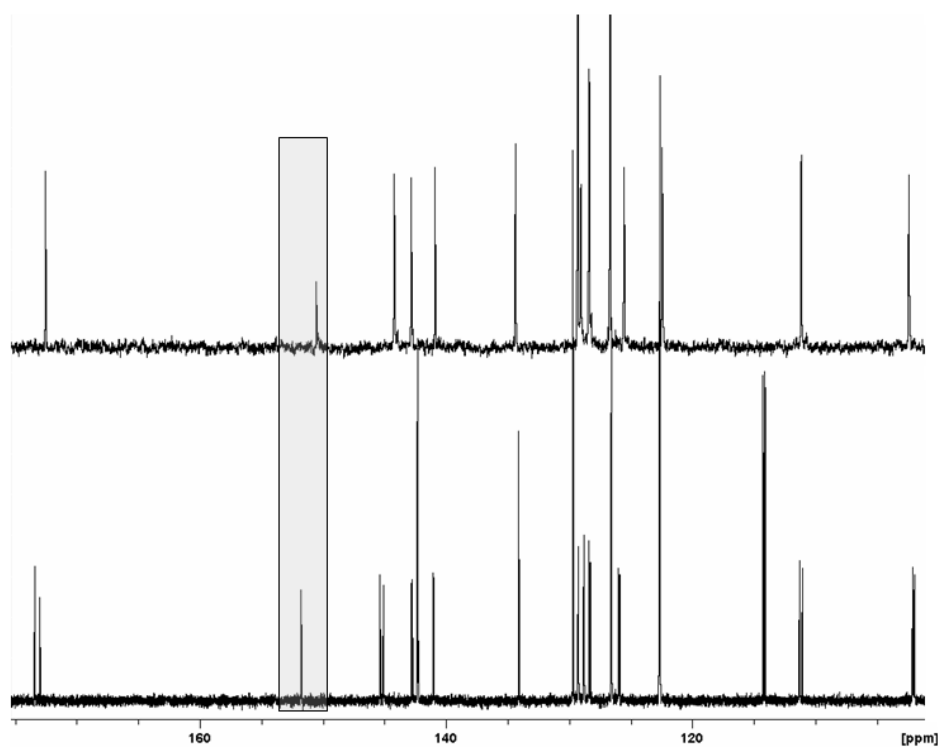

Figure S1 : aromatic region of the  $^{13}\text{C}$  NMR spectrum ( $\text{CDCl}_3$ , RT, 50.32 MHz) of  $[1][\text{Br}]$  (up) and  $[1][\Delta\text{-TRISPHAT}]$  (down). (NMR signal of  $\text{C}_7$  appears in the grey area)

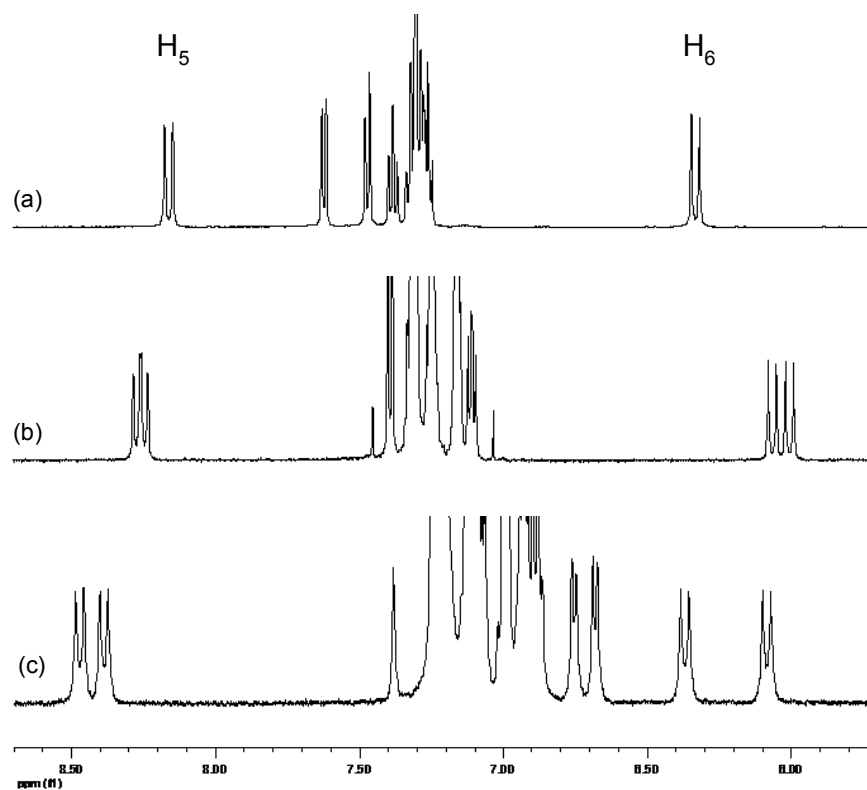

Figure S2. Aromatic region of  $^1\text{H}$  NMR (RT, 500 MHz) of  $[1][\Delta\text{-TRISPHAT}]$  in  $\text{DMSO-}d_6$  (a),  $\text{CDCl}_3$  (b),  $\text{benzene-}d_6$  (c)

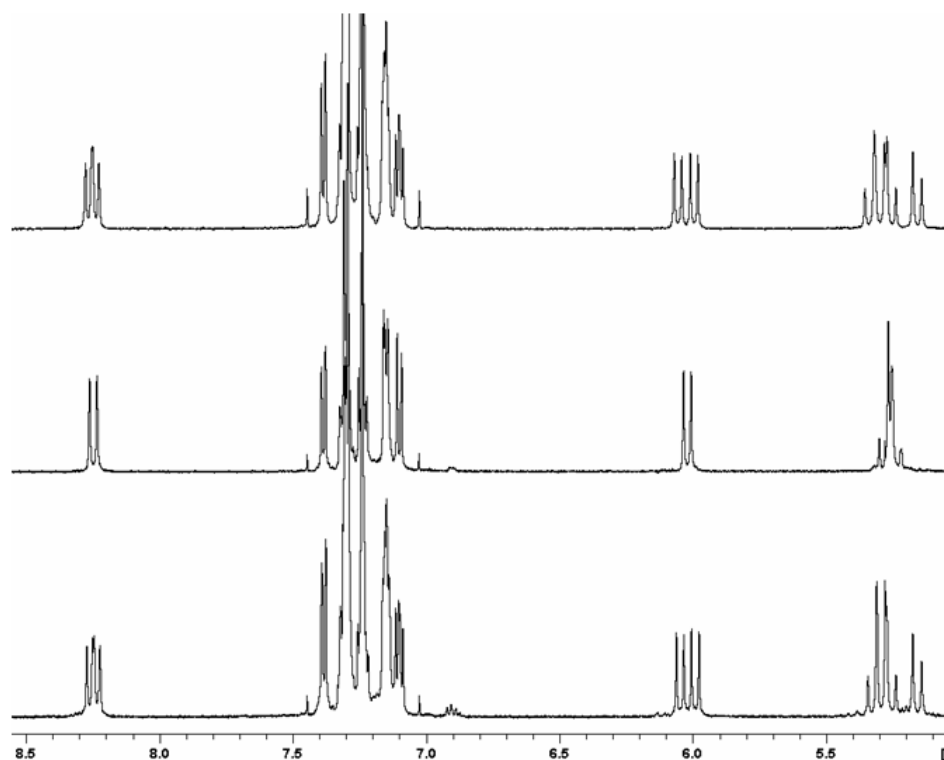

Figure S3: Aromatic region of  $^1\text{H}$  NMR spectra ( $\text{CDCl}_3$ , RT, 500 MHz) of  $[\mathbf{1}][\Delta\text{-TRISPHAT}]$  (up),  $[\mathbf{1}][\text{rac-TRISPHAT}]$  (middle),  $[\mathbf{1}][\Lambda\text{-TRISPHAT}]$  (down)

---

<sup>1</sup> Nonius, *Kappa CCD Program Package: COLLECT, DENZO, SCALEPACK, SORTAV*, Nonius B. V., Delft, The Netherlands, 1999.

<sup>2</sup> G. Cascarano, A. Altomare, C. Giacovazzo, A. Guagliardi, A. G. G. Moliterni, D. Siliqi, M. C. Burla, G. Polidori, M. Camalli, *Acta Crystallogr.*, 1996, A52, C-79.

<sup>3</sup> D. J. Watkin, C. K. Prout, J. R. Carruthers, P. W. Betteridge, *CRISTAL Issue 11*, CRISTAL Issue 11, Chemical Crystallography Laboratory, Oxford, UK, 1999.
